# Supplementary material for: Micellar Carriers of Active Substances Based on Amphiphilic PEG/PDMS Heterograft Copolymers: Synthesis and Biological Evaluation of Safe Use on Skin
Source: MDPI journal article supplement (doi:10.3390/ijms22031202), 2021-01-26
Supplement: s1 [file s1]

# Supporting Information

## Micellar carriers of active substances based on amphiphilic PEG/PDMS heterograft copolymers: synthesis and biological evaluation of safe use on skin

Justyna Odrobińska<sup>1</sup>, Magdalena Skonieczna<sup>2,3</sup>, and Dorota Neugebauer<sup>1,\*</sup>

<sup>1</sup> Department of Physical Chemistry and Technology of Polymers, Faculty of Chemistry, Silesian University of Technology, 44-100 Gliwice, Poland

<sup>2</sup> Department of Systems Biology and Engineering, Silesian University of Technology, Akademicka 16, 44-100 Gliwice, Poland

<sup>3</sup> Biotechnology Centre, Silesian University of Technology, Krzywoustego 8, 44-100 Gliwice, Poland

\* Correspondence: dorota.neugebauer@polsl.pl

### Content:

**Synthesis procedure S1.** Synthesis of P(AIHEMA-*co*-MPEGMA) with EiBBR initiator (Example for I).

**Synthesis procedure S2.** Synthesis of P(AIHEMA-*co*-MPEGMA) with 4nBREBr<sub>2</sub> initiator (Example for IV).

**Procedure S3.** Cell culture.

**Table S1.** D<sub>n</sub> by volume for obtained micelles.

**Table S2.** Maximum amount of released drug for pH=7.4<sup>a</sup> and pH=5.5<sup>b</sup> in time.

**Table S3.** Results of Annexin V/PI double staining apoptosis assay.

**Table S4.** Typical graphs of Annexin V/PI double staining apoptosis assay.

**Figure S1.** <sup>1</sup>H NMR spectrum of the reaction mixture for copolymerization I, where m, p - the resonances related to monomer and polymer, respectively.

**Figure S2.** GPC traces of representative AIHEMA/MPEGMA copolymers.

**Figure S3.** <sup>1</sup>H NMR spectra of (a) PDMS-OH, (b) PDMS-Br and (c) PDMS-N<sub>3</sub>.

**Figure S4.** <sup>13</sup>C NMR spectra of (a) PDMS-OH, (b) PDMS-N<sub>3</sub>.

**Figure S5.** GPC traces before and after modifications of PDMS.

**Figure S6.** Plots of intensity I<sub>336</sub>/I<sub>332</sub> ratio as a function of the logarithm of copolymer concentration in aqueous solution determined by spectrofluorometry.

**Figure S7.** Size distribution intensity plots for micelles formed by heterografted copolymers (a) Ic, (b) IIc, and (c) Vc.

**Figure S8.** Kinetic profiles for (a) VitC, and (b) FA released from heterografted polymer micelles in PBS, pH=5.5.

**Figure S9.** Increase in confluency of (a) Me45, (b) 451-Lu cells in time treated with copolymer IIc\_FA (c = 100 µg/mL), CTR is control.

**Figure S10.** Me45 normal and senescent cells observed under the microscope after senescence test. Magnification 100 x, transit channel, scale bars 100 µm.

**Synthesis procedure S1.** Synthesis of P(AIHEMA-*co*-MPEGMA) with EiBBr Initiator (Example for I).

dNdpy (41.05 mg, 0.101 mmol), MPEGMA (6.20 mL, 13.39 mmol), AIHEMA (1.00 g, 4.46 mmol), and solvents (10 vol.% of monomers; MeOH : ANS = 1: 6): MeOH (0.103 mL), ANS (0.612 mL) were placed in a Schlenk flask and degassed by two freeze–pump–thaw cycles. Then, EiBBr (6.62  $\mu$ L, 0.045 mmol) was added and degassed again. After that, CuBr (6.40 mg, 0.045 mmol) was added. The reaction flask was immersed in an oil bath at 60 °C. The polymerization was stopped by exposure to air. Then, the mixture was dissolved in chloroform and passed through a neutral alumina column to remove CuBr. The solution was concentrated and the polymer was precipitated by dropwise addition of a concentrated solution into diethyl ether. The product was isolated by decantation and dried under vacuum to constant mass.

**Synthesis procedure S2.** Synthesis of P(AIHEMA-*co*-MPEGMA) with 4nBREBr<sub>2</sub> Initiator (Example for IV).

4nBREBr<sub>2</sub> (22.10 mg, 0.051 mmol), dNdpy (41.05 mg, 0.101 mmol), MPEGMA (6.20 mL, 13.39 mmol), AIHEMA (1.00 g, 4.47 mmol), and solvents (10 vol.% of monomers; MeOH : ANS = 1: 3): MeOH (0.180 mL), ANS (0.540 mL) were placed in a Schlenk flask and then degassed by three freeze–pump–thaw cycles. After that, CuBr (6.40 mg, 0.045 mmol) was added. The reaction flask was immersed in an oil bath at 60 °C. The next steps were performed according to above-described procedure for the synthesis of P(AIHEMA-*co*-MMA) with EiBBr (Synthesis procedure S1).

**Procedure S3.** Cell culture.

All cells (Me45, 451-Lu, NHDF, HaCaT) were grown in sterile culture bottles with a culture area of 75 cm<sup>2</sup> in DMEM-F12 medium supplemented with 10% (v/v) inactivated fetal bovine serum (FBS) (EURx, Poland) and 1% antibiotics (10,000  $\mu$ g/mL of streptomycin and 10,000 units/mL of penicillin) (Sigma-Aldrich, Germany) at 37 °C in a humidified atmosphere with 5% CO<sub>2</sub>. Cell lines were seeded in a 96-well plate at a density of 10,000 cells per well in the case of MTT tests and a density of 100000 cells per well in the case of apoptosis and cell cycle analyses (6-well plate).

**Table S1.** D<sub>h</sub> by volume for obtained micelles.

| No.  | D <sub>h</sub> $\pm$ SD (nm) |                         |                          |                         |
|------|------------------------------|-------------------------|--------------------------|-------------------------|
|      | empty                        | VitC                    | ARG                      | FA                      |
| Ic   | 154 $\pm$ 21                 | 543 $\pm$ 70            | 260 $\pm$ 4              | 690 $\pm$ 31            |
| IIc  | <sup>a</sup> 64 $\pm$ 17     | <sup>a</sup> 92 $\pm$ 8 | <sup>a</sup> 117 $\pm$ 2 | 134 $\pm$ 4             |
| IIIc | 431 $\pm$ 98                 | 267 $\pm$ 55            | 231 $\pm$ 27             | <sup>a</sup> 50 $\pm$ 8 |
| IVc  | 385 $\pm$ 9                  | 142 $\pm$ 13            | 458 $\pm$ 82             | 105 $\pm$ 3             |
| Vc   | 93 $\pm$ 10                  | 178 $\pm$ 26            | 364 $\pm$ 20             | 10 $\pm$ 1              |

<sup>a</sup> value of particle size for dominated fraction

**Table S2.** Maximum amount of released drug for pH=7.4<sup>a</sup> and pH=5.5<sup>b</sup> in time.

| No.  | Maximum amount of released drug (%) / time (min) |                   |                  |                  |                 |                 |
|------|--------------------------------------------------|-------------------|------------------|------------------|-----------------|-----------------|
|      | VitC <sup>a</sup>                                | VitC <sup>b</sup> | ARG <sup>a</sup> | ARG <sup>b</sup> | FA <sup>a</sup> | FA <sup>b</sup> |
| Ic   | 43/60                                            | 77/75             | 23/10            | n.o.             | 95/90           | 80/180          |
| Ic   | 63/130                                           | 63/180            | 74/60            | n.o.             | 84/240          | 69/180          |
| IIIc | 31/130                                           | 13/120            | 92/180           | n.o.             | 99/120          | 76/180          |
| IVc  | 24/50                                            | 99/75             | 96/180           | n.o.             | 92/300          | 53/180          |
| Vc   | 24/80                                            | 59/50             | n.o.             | n.o.             | 81/300          | 82/180          |

n.o.: no released substance was observed

**Table S3.** Results of Annexin V/PI double staining apoptosis assay.

| IIIc_FA concentration [μg/mL] |       | % of cells ± S.D. |             |             |              |
|-------------------------------|-------|-------------------|-------------|-------------|--------------|
|                               |       | A-/PI-            | A+/PI-      | A+/PI+      | A-/PI+       |
| 0 (CTR)                       | NHDF  | 95.82 ± 0.24      | 1.64 ± 0.15 | 1.17 ± 0.13 | 1.36 ± 0.18  |
|                               | 3     | 95.61 ± 0.51      | 1.34 ± 0.18 | 0.96 ± 0.30 | 2.09 ± 0.26  |
|                               | 100   | 95.83 ± 0.38      | 0.64 ± 0.14 | 1.36 ± 0.29 | 2.17 ± 0.66  |
| 0 (CTR)                       | HaCaT | 85.07 ± 0.67      | 0.19 ± 0.06 | 0.17 ± 0.04 | 14.58 ± 0.72 |
|                               | 3     | 80.21 ± 1.48      | 0.24 ± 0.16 | 0.46 ± 0.11 | 19.09 ± 1.27 |
|                               | 100   | 87.94 ± 2.76      | 0.05 ± 0.08 | 0.19 ± 0.13 | 11.81 ± 2.65 |
| 0 (CTR)                       | Me45  | 90.22 ± 1.63      | 0.03 ± 0.02 | 0.07 ± 0.03 | 9.68 ± 1.60  |
|                               | 3     | 91.00 ± 1.44      | 0.01 ± 0.01 | 0.07 ± 0.03 | 8.91 ± 1.42  |
|                               | 100   | 93.43 ± 1.42      | 0.02 ± 0.02 | 0.06 ± 0.03 | 6.49 ± 1.41  |

A-/PI-: live cells; A+/PI-: early apoptosis; A+/PI+: late apoptosis; A-/PI+: necrosis

**Table S4.** Typical graphs of Annexin V/PI double staining apoptosis assay.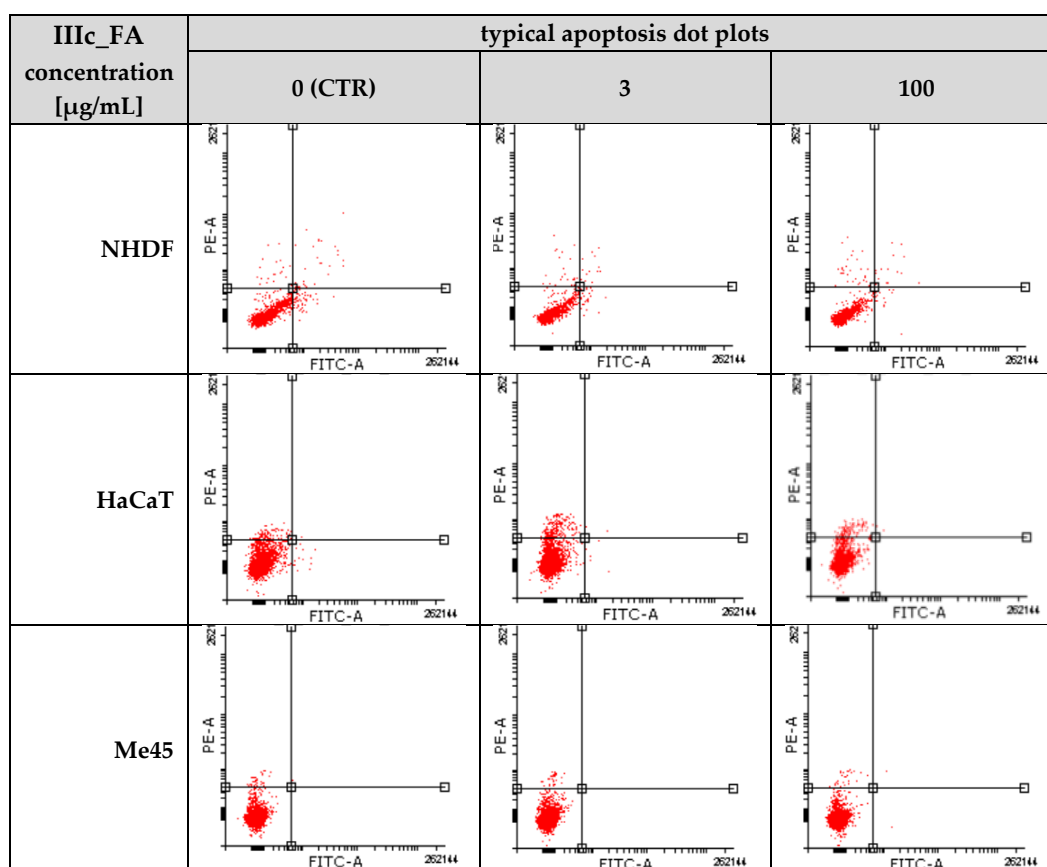

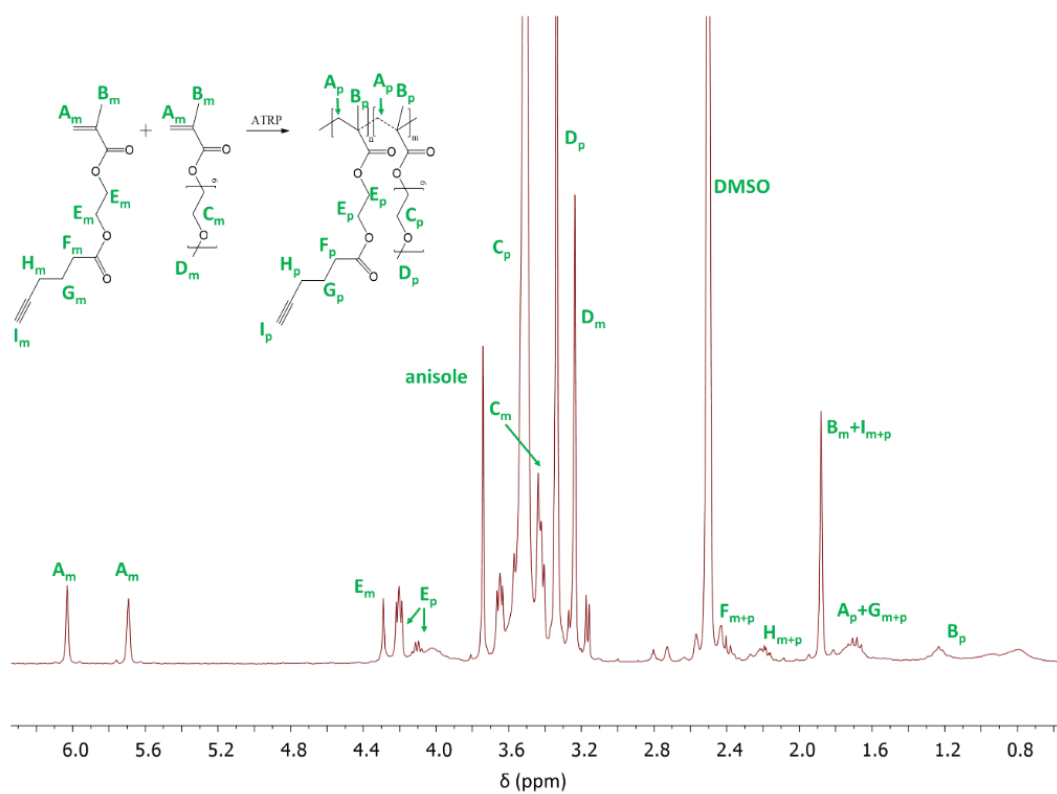

**Figure S1.**  $^1\text{H}$  NMR spectrum of the reaction mixture for copolymerization I, where  $m$ ,  $p$  - the resonances related to monomer and polymer, respectively.

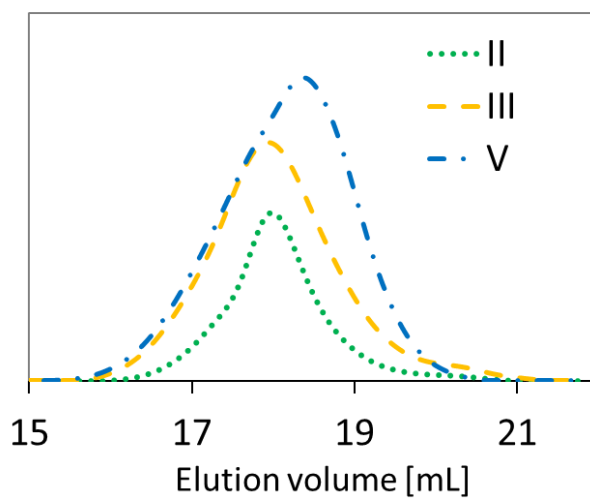

**Figure S2.** GPC traces of representative AIHEMA/MPEGMA copolymers.

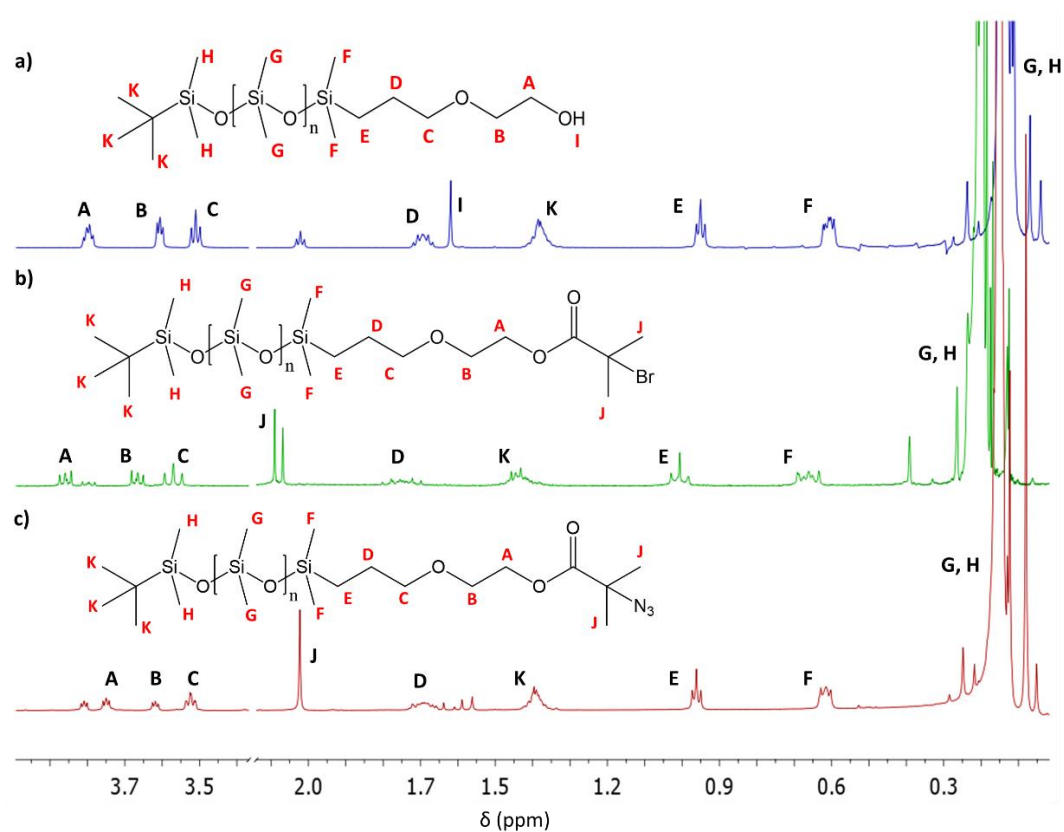

**Figure S3.**  $^1\text{H}$  NMR spectra of (a) PDMS-OH, (b) PDMS-Br and (c) PDMS- $\text{N}_3$ .

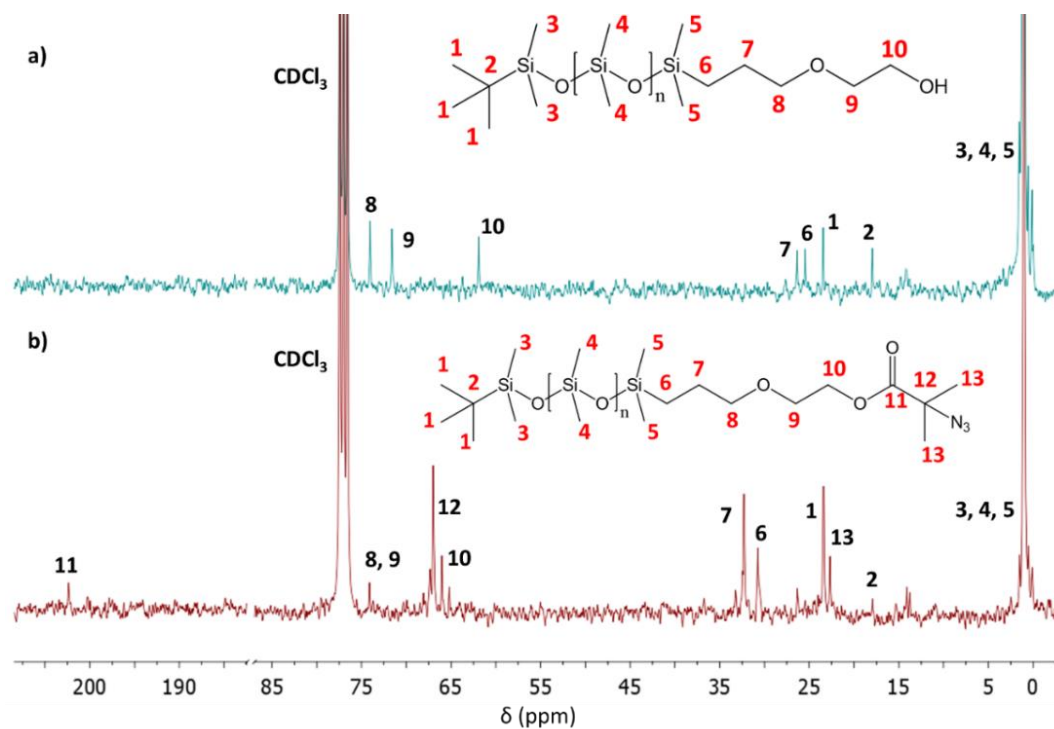

**Figure S4.**  $^{13}\text{C}$  NMR spectra of (a) PDMS-OH, (b) PDMS- $\text{N}_3$ .

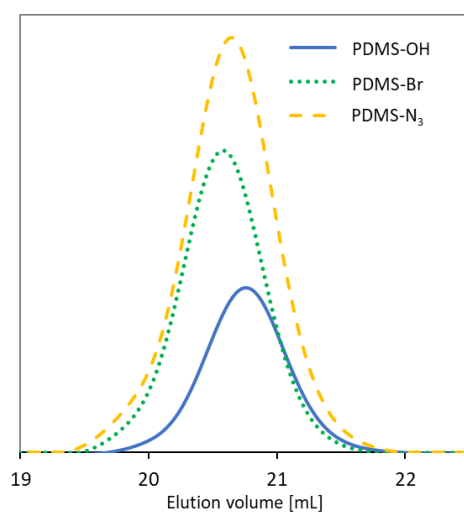

**Figure S5.** GPC traces before and after modifications of PDMS.

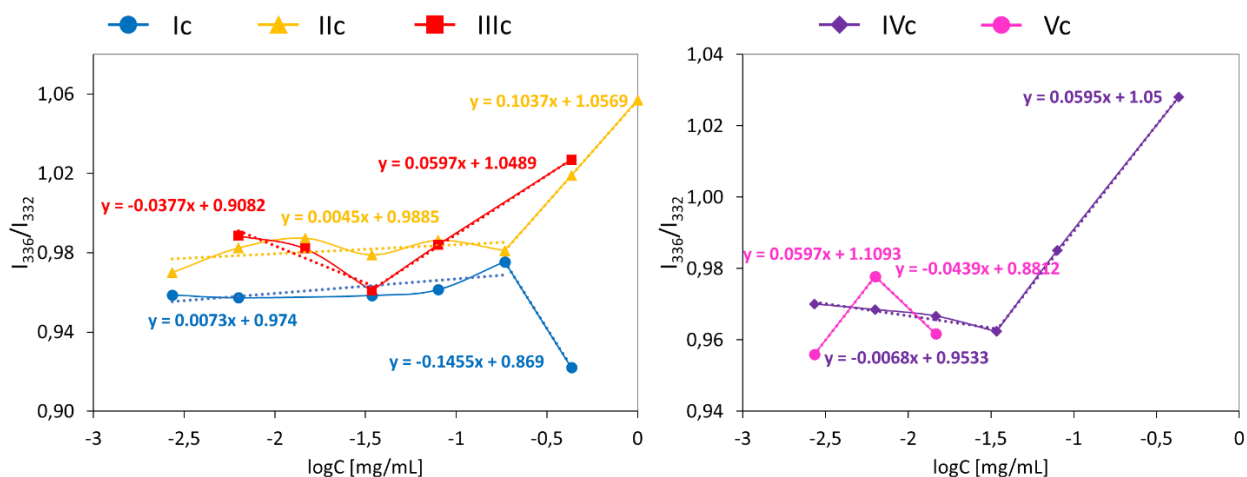

**Figure S6.** Plots of intensity  $I_{336}/I_{332}$  ratio as a function of the logarithm of copolymer concentration in aqueous solution determined by spectrofluorometry.

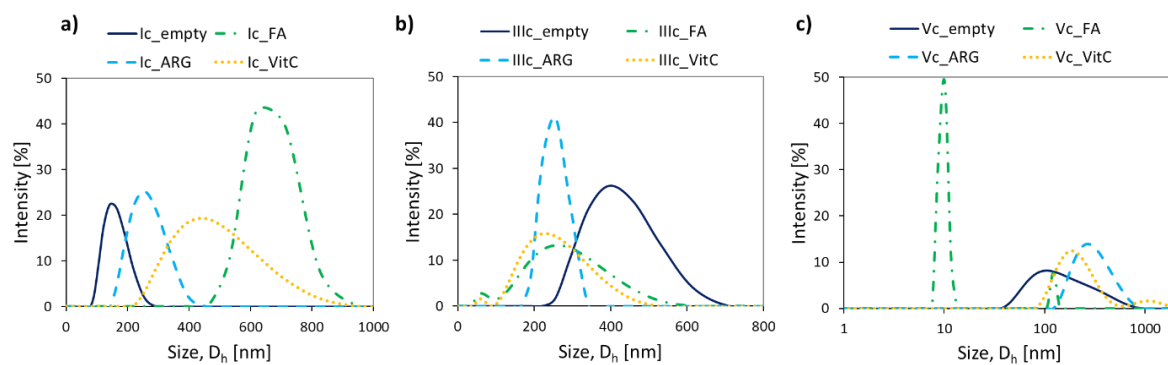

**Figure S7.** Size distribution intensity plots for micelles formed by heterografted copolymers (a) Ic, (b) IIIc, and (c) Vc.

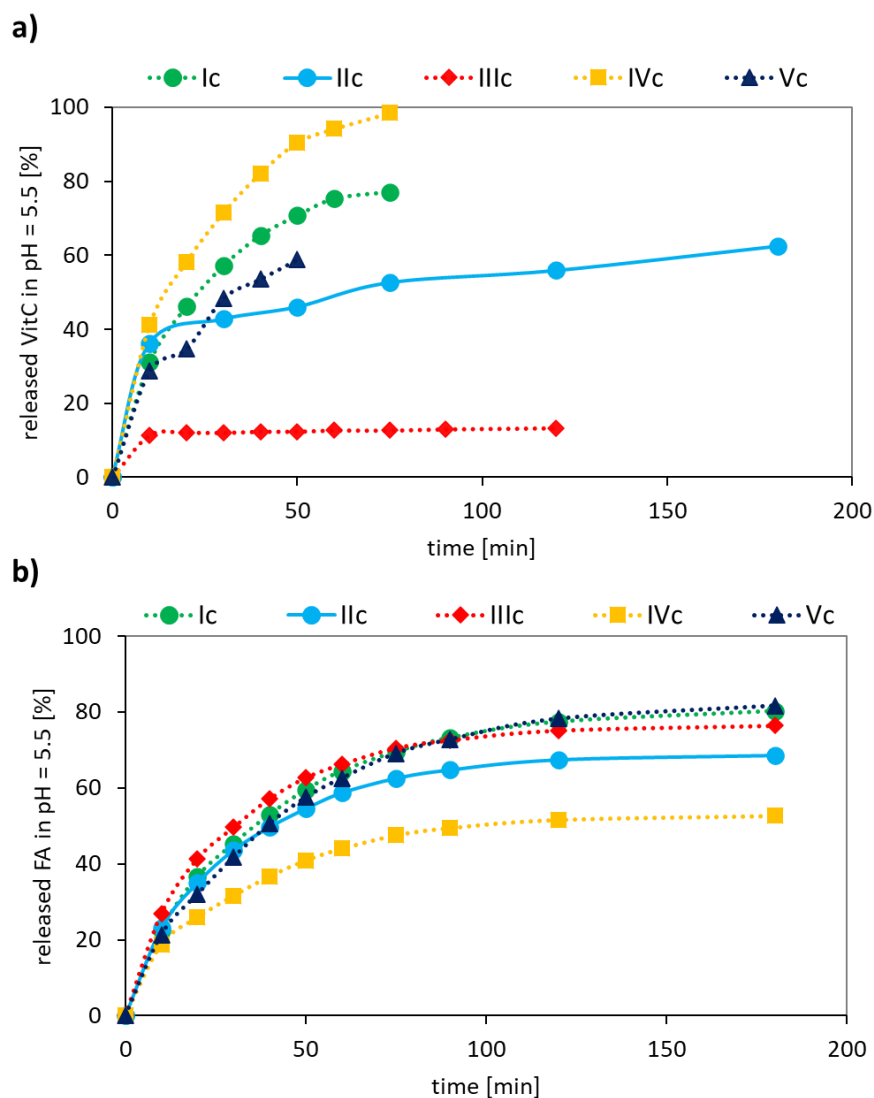

**Figure S8.** Kinetic profiles for (a) VitC, and (b) FA released from heterografted polymer micelles in PBS pH=5.5.

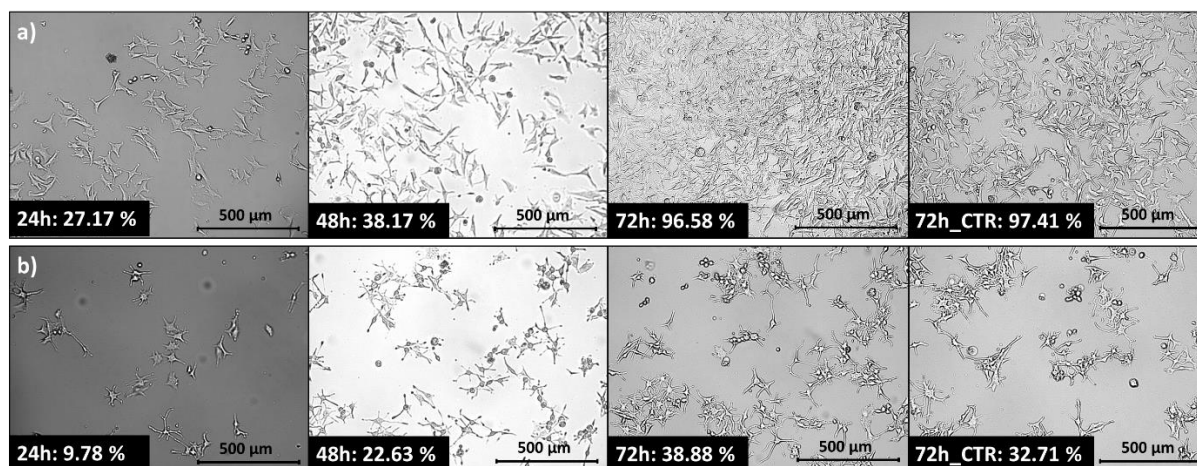

**Figure S9.** Increase in confluency of (a) Me45, (b) 451-Lu cells in time treated with copolymer IIIc\_FA ( $c = 100 \mu\text{g/mL}$ ), CTR is control.

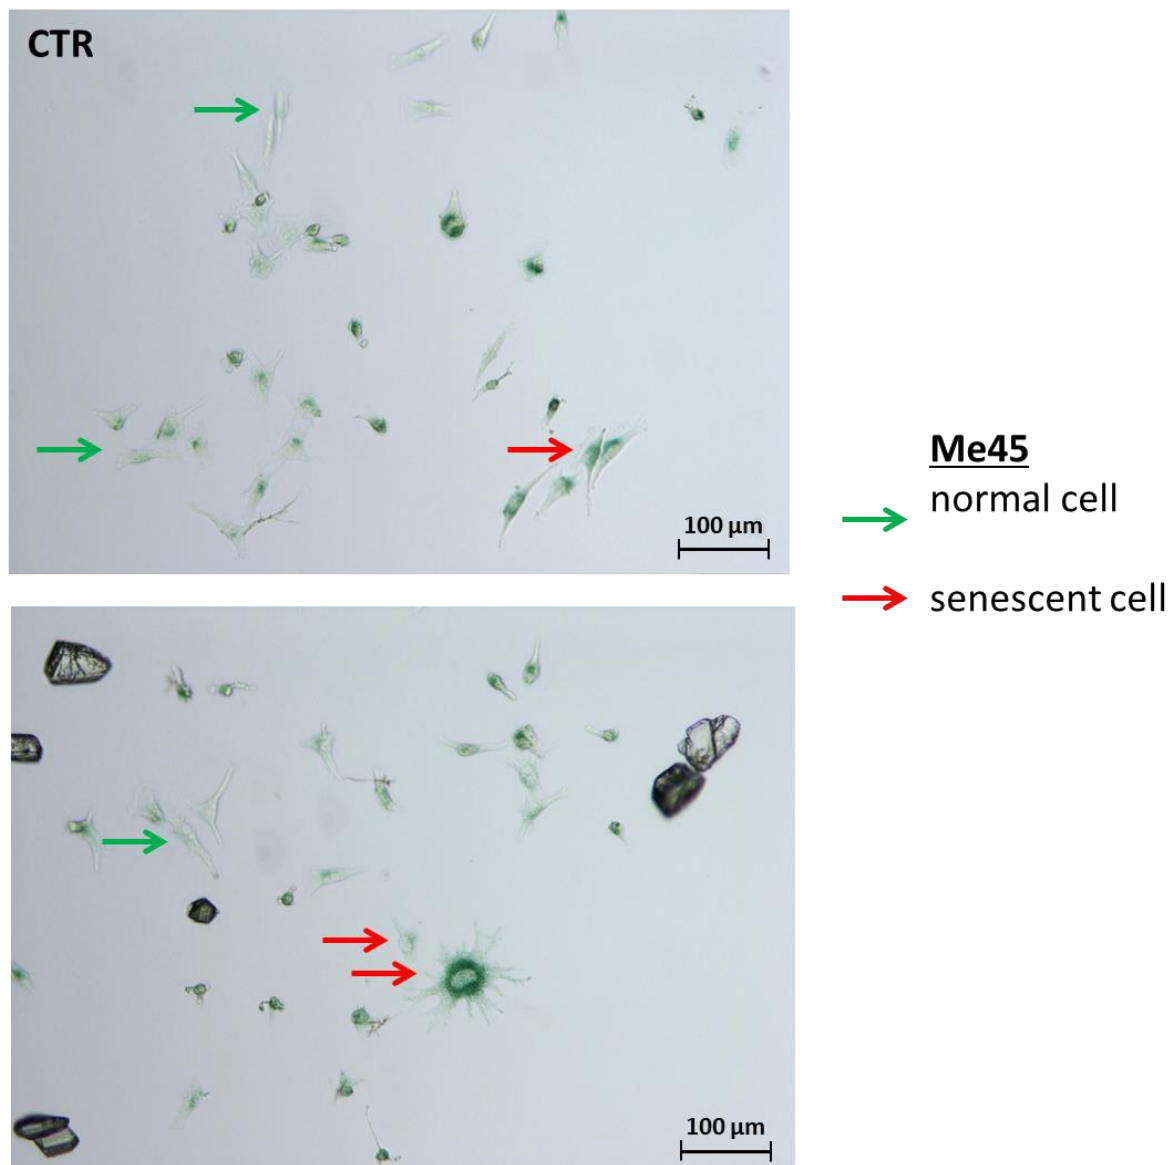

**Figure S10.** Me45 normal and senescent cells observed under the microscope after senescence test. Magnification 100 x, transit channel, scale bars 100 μm.
